# Supplementary material for: Real-time automatic detection system increases colonoscopic polyp and adenoma detection rates: a prospective randomised controlled study
Source: PubMed Central journal article supplement — Gut. 2019 Feb 27;68(10):1813–9. doi: 10.1136/gutjnl-2018-317500 (PMC6839720; doi:10.1136/gutjnl-2018-317500), 2019-02-27
Supplement: gutjnl-2018-317500supp002.pdf [file gutjnl-2018-317500supp002.pdf]

|                                |             |             |      |
|--------------------------------|-------------|-------------|------|
| Family history of adenoma      |             |             | 0.34 |
| None, n (%)                    | 532 (99.25) | 515 (98.66) |      |
| Yes, n (%)                     | 4 (0.75)    | 7 (1.34)    |      |
| Family history of colon cancer |             |             | 0.78 |
| None, n (%)                    | 501 (93.47) | 490 (93.87) |      |
| Any, n (%)                     | 35 (6.53)   | 32 (6.13)   |      |
| Personal history of adenoma    |             |             | 0.8  |
| None, n (%)                    | 522 (97.39) | 507 (97.13) |      |
| Any, n (%)                     | 14 (2.61)   | 15 (2.87)   |      |
| Diabetes mellitus              |             |             | 0.46 |
| No, n (%)                      | 505 (94.22) | 486 (93.10) |      |
| Yes, n (%)                     | 31 (5.78)   | 36 (6.90)   |      |
| Coronary artery disease        |             |             | 0.96 |
| No, n (%)                      | 527 (98.32) | 513 (98.28) |      |
| Yes, n (%)                     | 9 (1.68)    | 9 (1.72)    |      |
| Tobacco use                    |             |             | 0.07 |
| No, n (%)                      | 426 (79.48) | 390 (74.71) |      |
| Yes, n (%)                     | 110 (20.52) | 132 (25.29) |      |
| Alcohol use                    |             |             | 0.12 |
| No, n (%)                      | 409 (76.31) | 377 (72.22) |      |
| Yes, n (%)                     | 127 (23.69) | 145 (27.78) |      |
| Acetylsalicylic acid use       |             |             | 0.2  |
| No, n (%)                      | 497 (92.72) | 494 (94.64) |      |
| Yes, n (%)                     | 39 (7.28)   | 28 (5.36)   |      |
| NSAID use                      |             |             | 0.91 |
| No, n (%)                      | 499 (93.10) | 485 (92.91) |      |
| Yes, n (%)                     | 37 (6.90)   | 37 (7.09)   |      |
| Folate use                     |             |             | 0.81 |
| No, n (%)                      | 519 (96.83) | 504 (96.55) |      |
| Yes, n (%)                     | 17 (3.17)   | 18 (3.45)   |      |
| Calcium/vitamin D use          |             |             | 0.14 |
| No, n (%)                      | 448 (83.58) | 418 (80.08) |      |
| Yes, n (%)                     | 88 (16.42)  | 104 (19.92) |      |
| Hormone replacement therapy    |             |             | 0.9  |
| No, n (%)                      | 521 (97.20) | 508 (97.32) |      |
| Yes, n (%)                     | 15 (2.80)   | 14 (2.68)   |      |

**Table S1. Baseline Information**
